# Supplementary material for: p27/Kip1 functions as a tumor suppressor and oncoprotein in osteosarcoma
Source: PubMed Central journal article supplement (PMC6467888; doi:10.1038/s41598-019-42450-0), 2019-04-16
Supplement: 41598_2019_42450_MOESM1_ESM.pdf [file 41598_2019_42450_MOESM1_ESM.pdf]

**Title: p27/Kip1 functions as a tumor suppressor and oncoprotein in osteosarcoma.**

Arthur W. Currier<sup>1,2</sup>, E.A. Kolb<sup>1</sup>, Richard G. Gorlick<sup>3</sup>, Michael E. Roth<sup>3</sup>, Vidya Gopalakrishnan<sup>3</sup>,  
Valerie B. Sampson<sup>1\*</sup>

**Supplementary dataset File**

**Supplementary Table S1**

| AZD1775 (nM) | Gemcitabine (nM) | Fa   | CI   |
|--------------|------------------|------|------|
| 100          | 1.0              | 0.80 | 1.49 |
| 100          | 3.2              | 0.35 | 0.25 |
| 100          | 6                | 0.24 | 0.16 |
| 100          | 30               | 0.07 | 0.05 |
| 100          | 100              | 0.14 | 0.22 |
| 30           | 6                | 0.45 | 0.22 |
| 60           | 6                | 0.35 | 0.19 |
| 250          | 6                | 0.17 | 0.24 |
| 500          | 6                | 0.13 | 0.34 |

**Table S1:** Concentrations of AZD1775 and gemcitabine that were used for titrations to determine synergy of agents.

Fa – Fraction affected

CI – Combination Index

**Supplementary Figure S1**

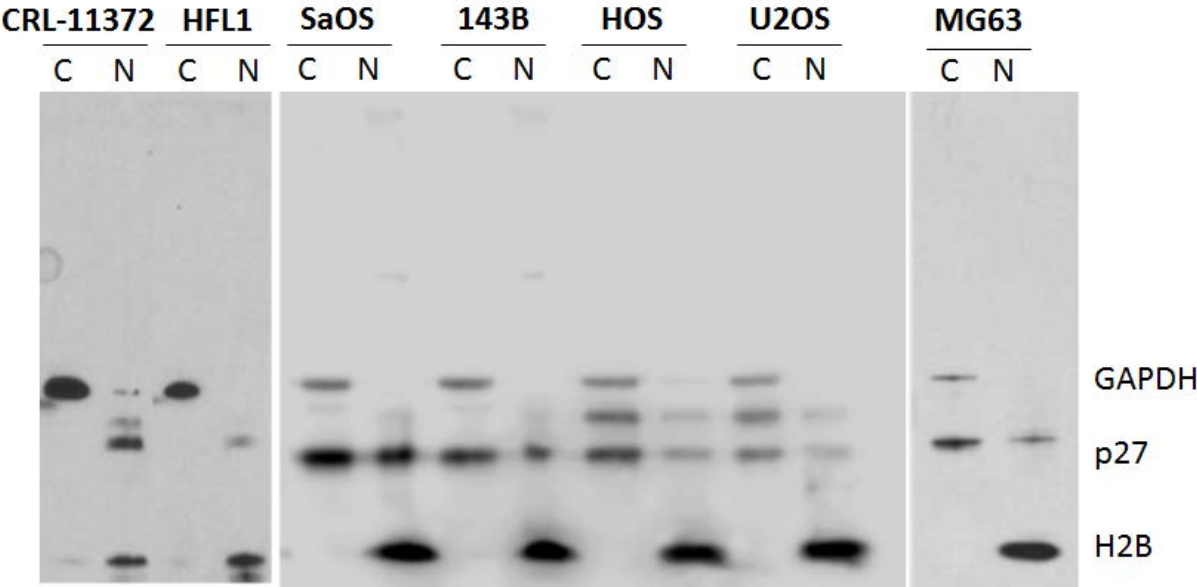

**Figure S1:** Full length immunoblot for Figure 1B.

**Supplementary Figure S2**

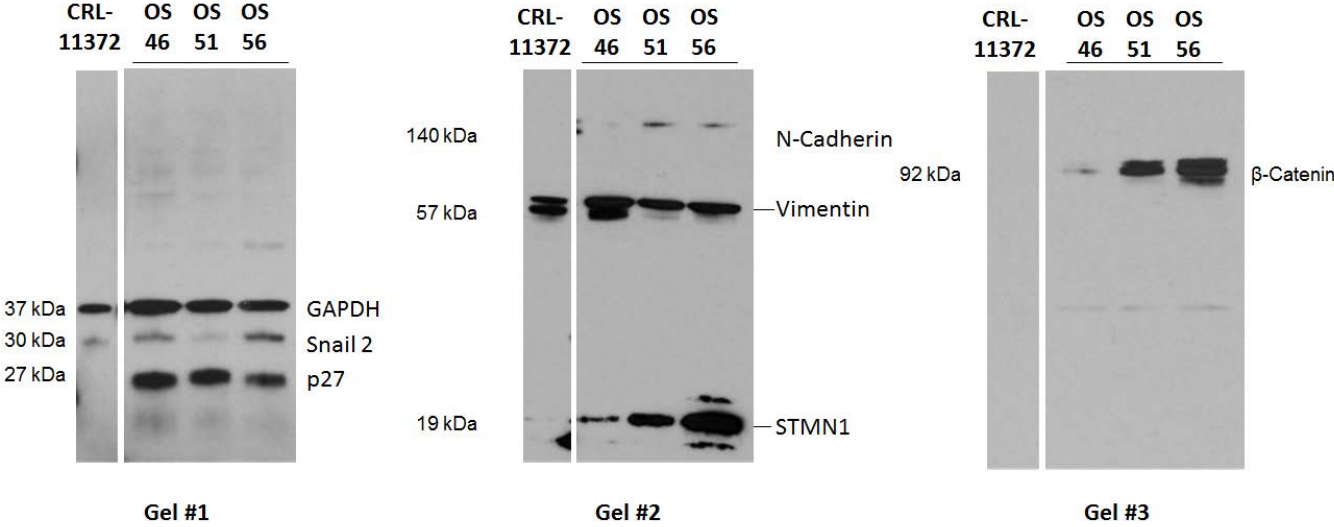

**Figure S2:** Full length immunoblot for Figure 1E.

**Supplementary Figure S3**

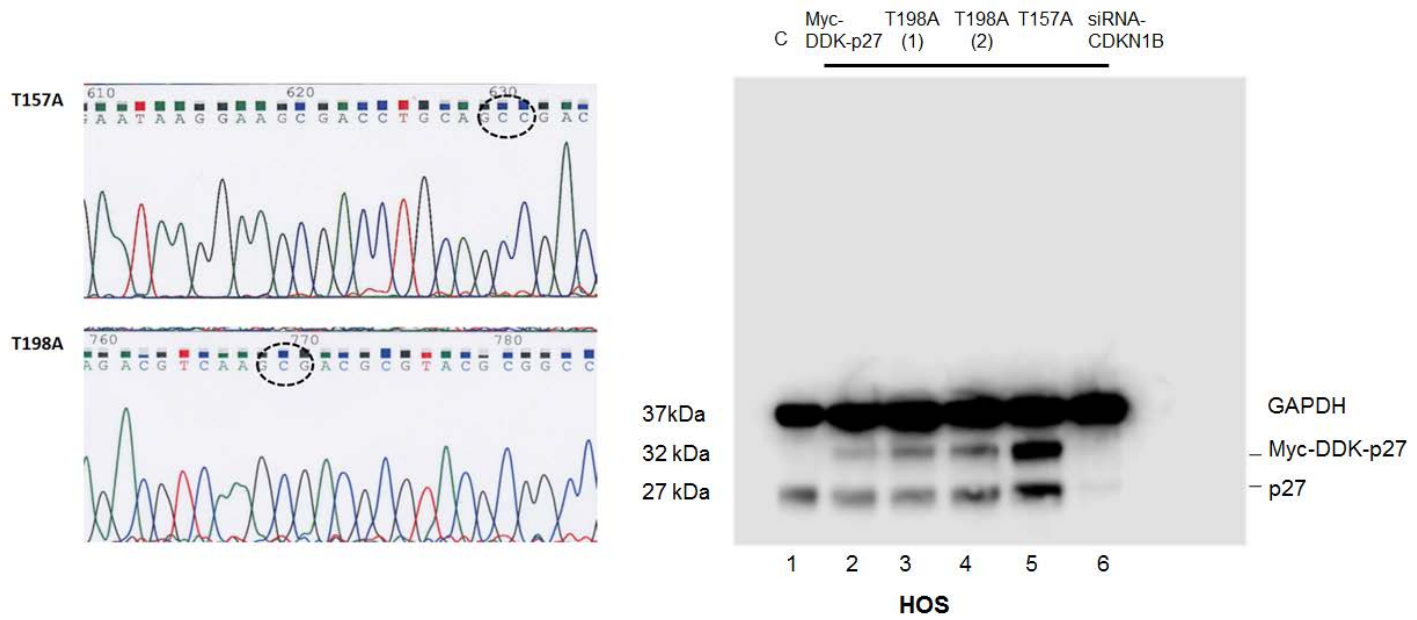

**Figure S3:** Sequencing data for T157 and T198 amino acid mutations (Alanine sequences are shown in dotted black circles) and full length immunoblot for Figure 2C

**Supplementary Figure S4**

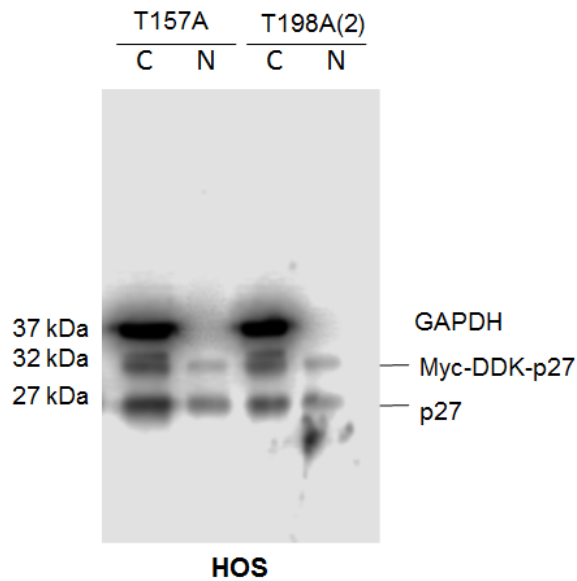

**Figure S4:** Full length immunoblot for Figure 2D.

**Supplementary Figure S5**

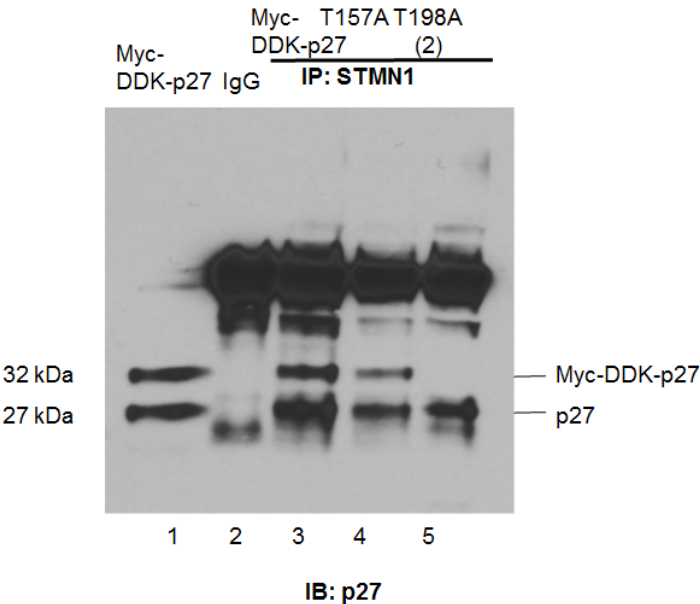

**Figure S5:** Full length immunoblot for Figure 2E.

**Supplementary Figure S6**

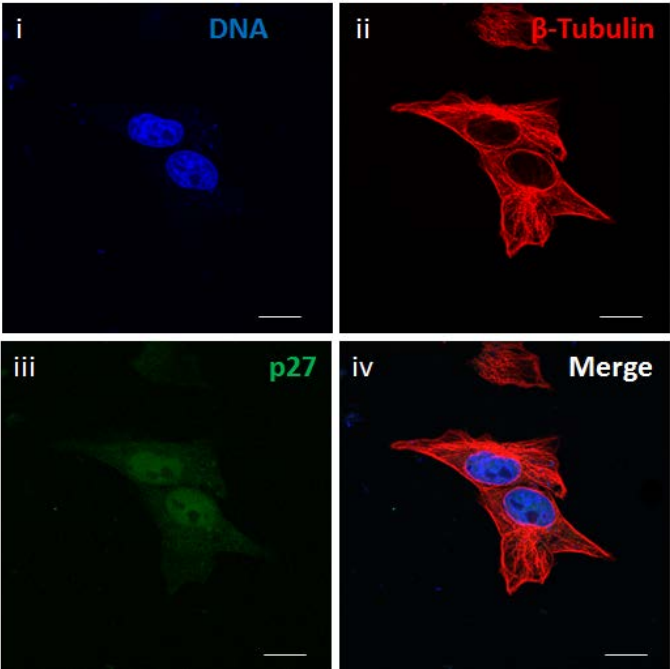

**Figure S6:** Immunofluorescence staining of 143B cells transfected with pCMV- Myc-DDK empty vector control

**Supplementary Figure S7**

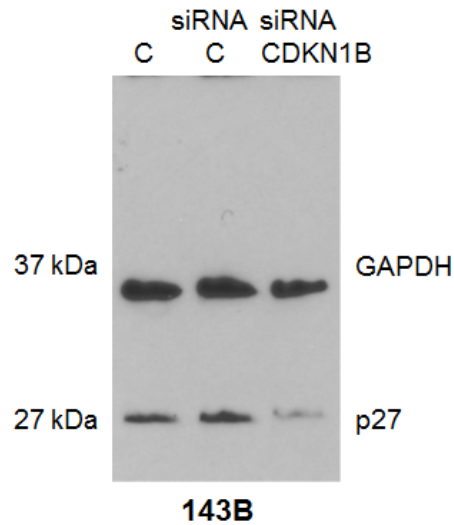

**Figure S7:** Immunoblot analysis for lysates of 143B cells treated with siRNA non-targeting (siRNA C) and siRNACDKN1B oligonucleotides using p27 antibody. GAPDH was loading control.

**Supplementary Figure S8**

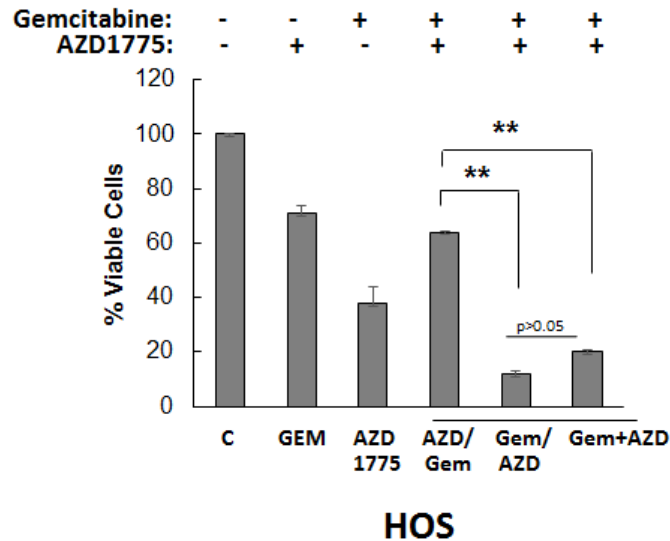

**Figure S8:** HOS cells were incubated with gemcitabine (GEM) and AZD1775 as indicated and cell viability was measured by the cell titer blue assay. Data is shown as mean + SE. \* represents  $p < 0.05$ ;  $n=6$ .

**Supplementary Figure S9**

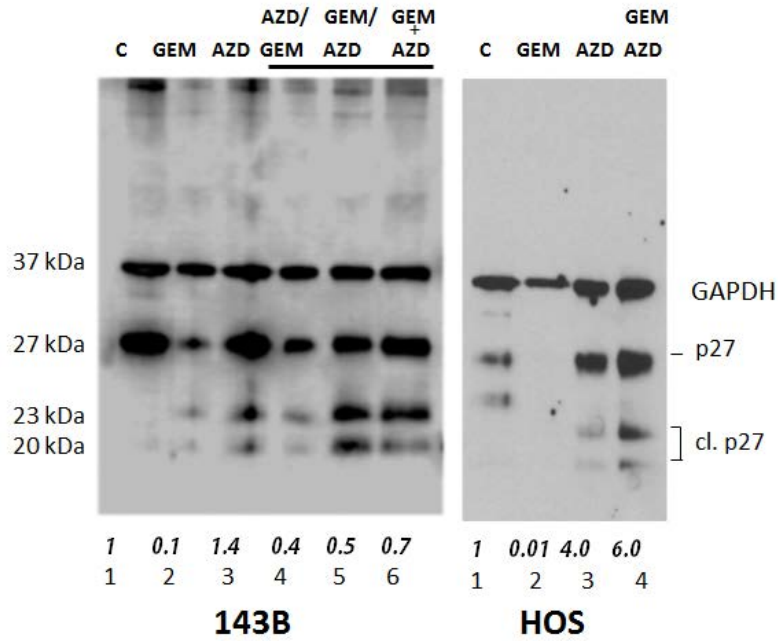

**Figure S9:** Full length immunoblot for Figure 4C.

**Supplementary Figure S10**

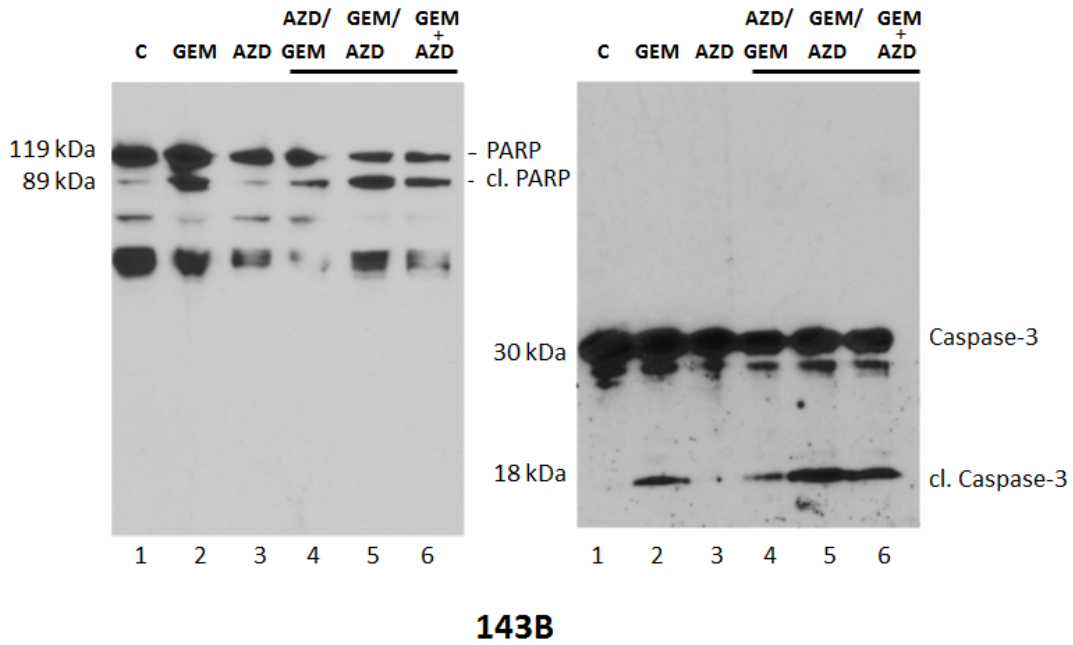

**Figure S10:** Full length immunoblot for Figure 4D.

## Supplementary Figure S11

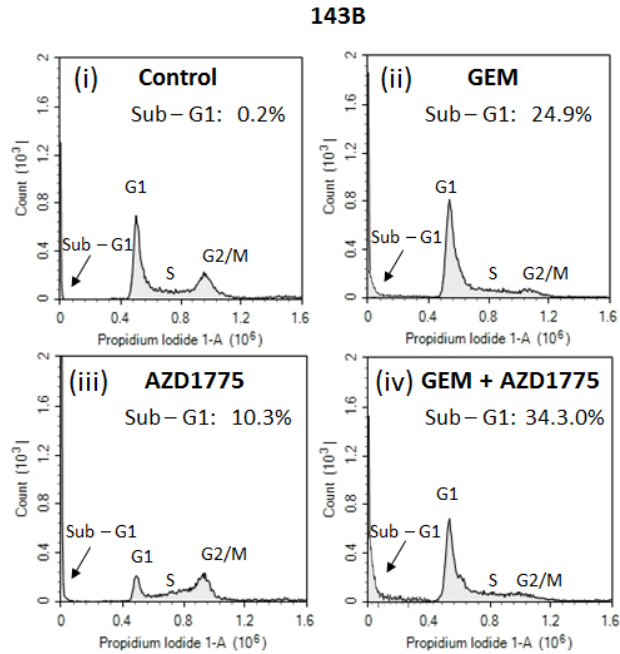

**Figure S11:** Cell cycle profiles of 143B cells subjected to indicated drug treatments with gemcitabine (GEM) and AZD1775 were measured by flow cytometry. Apoptosis was determined by measuring percent of cells in sub-G1 peak

## Supplementary Figure S12

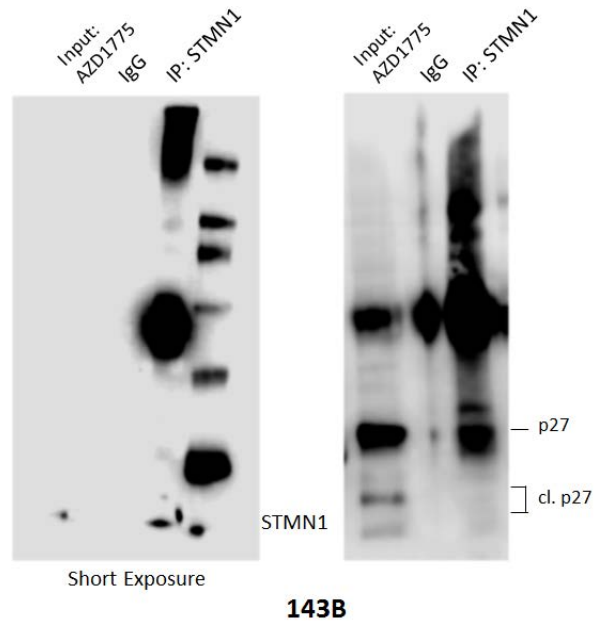

**Figure S12:** Full length immunoblot for Figure 4E.

**Supplementary Figure S13**

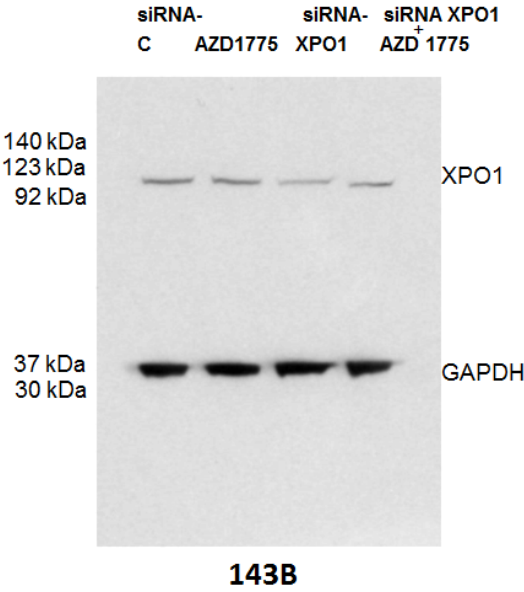

**Figure S13:** Full length immunoblot for Figure 5A

**Supplementary Figure S14**

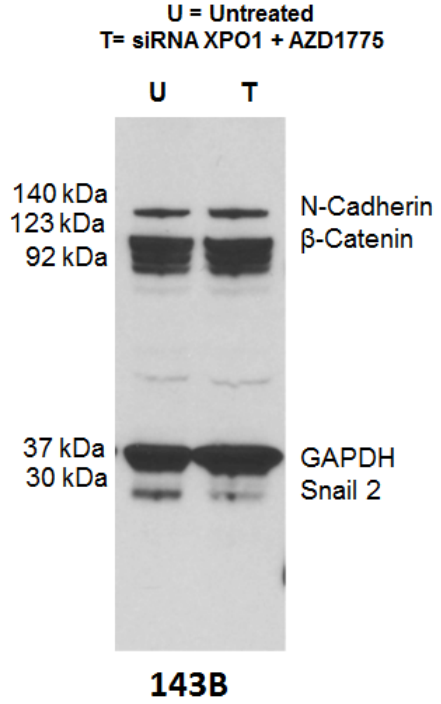

**Figure S14:** Full length immunoblot for Figure 5D.



Supplementary Figure S15

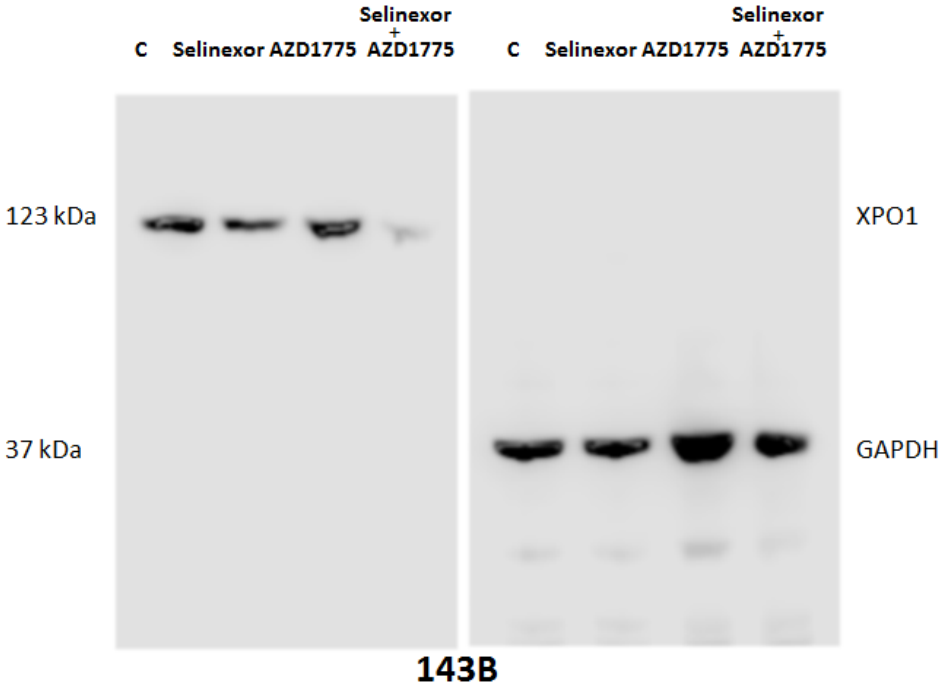

Figure S15: Full length immunoblot for Figure 5E.
